# Supplementary material for: Liver proteomic response to hypertriglyceridemia in human-apolipoprotein C-III transgenic mice at cellular and mitochondrial compartment levels
Source: PubMed Central journal article supplement (PMC4112841; doi:10.1186/1476-511x-13-116), 2014-07-21

**Figure S1:** Image of the internal standard (Cy2) in the Master gel of mitoproteome 2D-DIGE analysis.

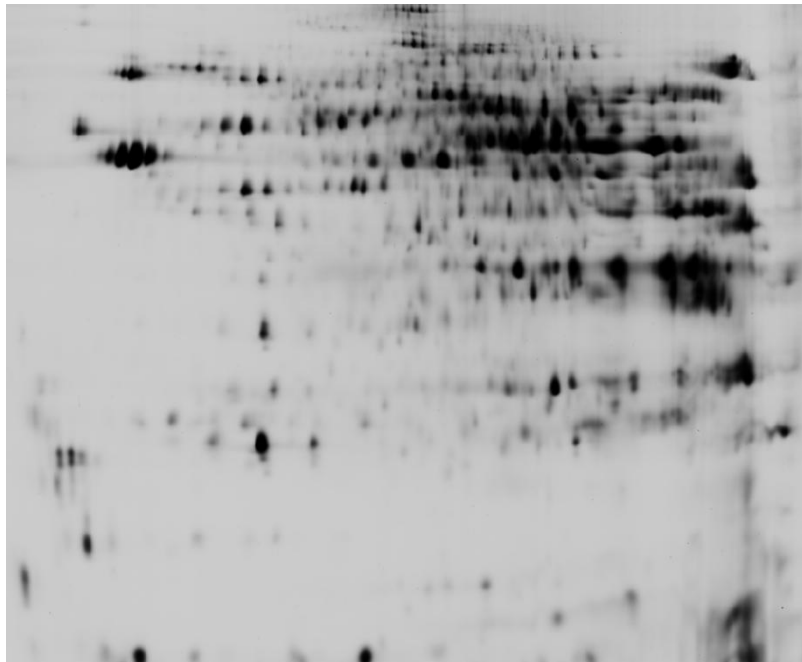

**Figure S2:** Pie charts classifying the identified PSOI of our mitoproteome 2D-DIGE analysis according to their localization. In Panel A, all identified PSOI are classified following their sub-cellular localization. In Panel B, mitochondrial PSOI are classified following their sub-mitochondrial localization. MITO, mitochondrion; ER, endoplasmic reticulum; PERO, peroxisome; CYTO, cytoplasm; MAT, matrix; IM, inner membrane; IMS, intermembrane space; OM, outer membrane; OTHER, other localization (cytoskeleton, plasma membrane, nucleus or extracellular medium); UNKN, unknown localization.

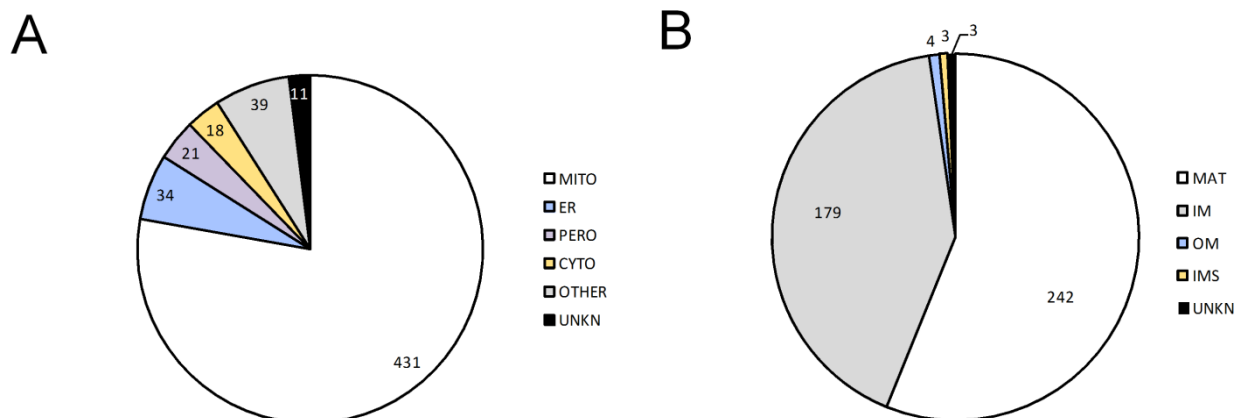

**Table S1:** Table summarizing the parameters (average:  $\mu$  and standard deviation:  $\sigma$ ) of the normal adjustments performed in Figure 2A. MAT, matrix; IM, inner membrane.

|        | $\mu$     | $\sigma$  |
|--------|-----------|-----------|
| MAT LE | -0,081822 | 0,0312873 |
| IM LE  | 0,0888245 | 0,0370956 |
| MAT HE | -0,276204 | 0,1255536 |
| IM HE  | 0,1498068 | 0,0607443 |

**Figure S3:** Image of the internal standard (Cy2) in the Master gel of matricial 2D-DIGE analysis.

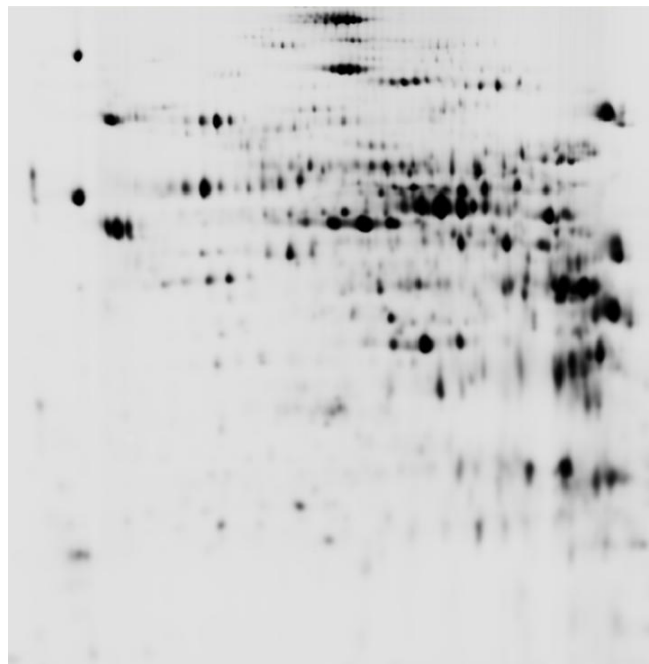

**Figure S4:** Image of the internal standard (Cy2) in the Master gel of inner membrane 2D-DIGE analysis.

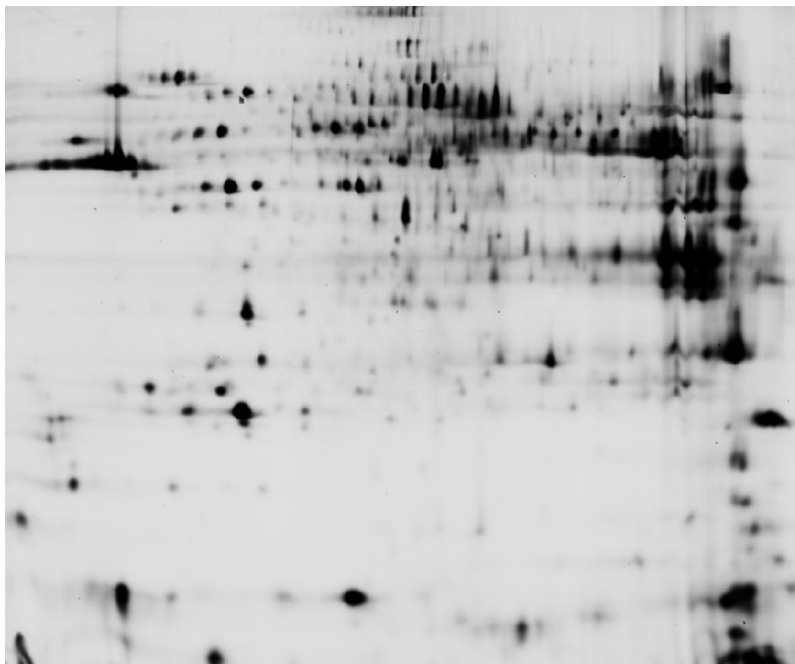

**Figure S5:** Image of the internal standard (Cy2) in the Master gel of cellular 2D-DIGE analysis.

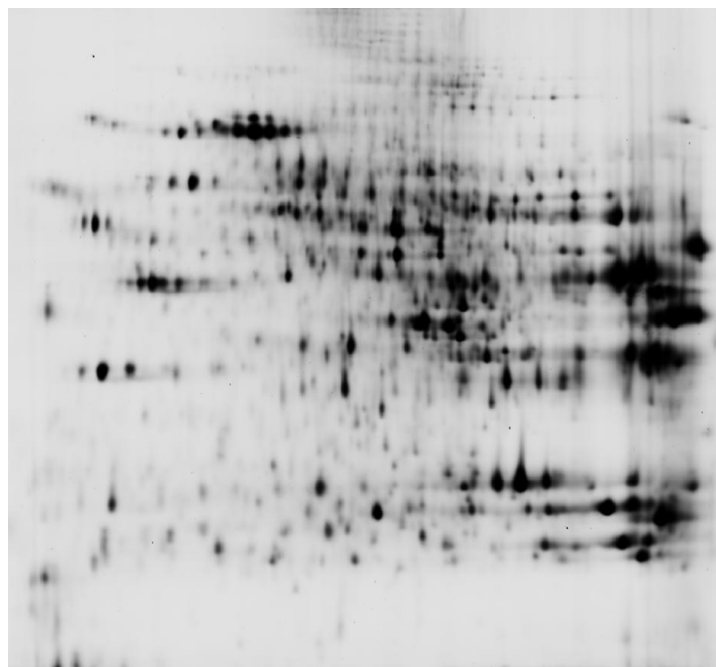

Supplement: 1476-511X-13-116-S1.pdf [file 1476-511X-13-116-S1.pdf]
